# Supplementary material for: Clinically Relevant Genes and Proteins Modulated by Tocotrienols in Human Colon Cancer Cell Lines: Systematic Scoping Review
Source: MDPI journal article supplement (doi:10.3390/nu13114056), 2021-11-12
Supplement: s1 [file s1]

## PICO Worksheet and Search Strategy Protocol

1. Defining PICO question by identifying: Patient/Problem (P), Intervention (I), Comparison (C), and Outcome (O):
  - ☒ Patient/Problem: **Human colorectal cancer cells**
  - ☒ Intervention: **Tocotrienols ( $\alpha$ ,  $\beta$ ,  $\gamma$ , &  $\delta$ )**
  - ☒ Comparison: **Untreated colorectal cancer cells (*if any*)**
  - ☒ Outcome: **Modulated genes and proteins**
2. Type of PICO question:
  - ☒ **Therapy**
  - ☒ **Prevention**
  - ☐ Diagnosis
  - ☐ Etiology
  - ☐ Prognosis
3. The main topics and alternate terms that can be used for the search:
  - ☒ **Tocotrienols**
  - ☒ **Genes**
  - ☒ **Proteins**
  - ☒ **Colorectal cancer**
  - ☒ **Colon cancer**
- ∴ PICO question: What genes and proteins that tocotrienols modulate in colorectal cancer cells to induce anti-cancer effects?
4. Type of studies to include in the search:
  - ☒ **Research studies or articles**
  - ☐ Meta-analysis
  - ☐ Systematic review
  - ☐ Clinical practice guidelines
  - ☐ Randomized controlled trial
  - ☐ Case report or series
  - ☐ Research report or other grey literature
5. Additional limits that may apply to the search:
  - ☒ **Year(s) of publication: 2010-2021 (Present)**
  - ☒ **Language(s): English**
  - ☐ Gender: N/A
  - ☐ Age: N/A

6. The databases for the search:

- ☑ **Ovid MEDLINE**
- ☑ **PubMed**
- ☑ **Scopus**
- ☑ **Embase**

7. PICO search strategy:

- Tocotrienol\* [Truncated – Stemming]
- **AND** Gene\* [Truncated – Stemming] **OR** Protein\* [Truncated – Stemming]
- **AND** Colorectal **OR** Colon
- **AND** Cancer

∴ **Table S1.** Inclusion and exclusion criteria for screening and full-text review.

| Category             | Included                                                    | Excluded                                                   |
|----------------------|-------------------------------------------------------------|------------------------------------------------------------|
| Problem type         | Human colon cancer cells                                    | Animal colon cancer cells                                  |
| Intervention type    | Tocotrienols ( $\alpha$ , $\beta$ , $\gamma$ , & $\delta$ ) | Tocopherols ( $\alpha$ , $\beta$ , $\gamma$ , & $\delta$ ) |
| Outcome type         | Modulated genes/proteins                                    | Synergistic effects                                        |
| Study type           | Research studies only                                       | All other types of studies and reviews                     |
| Study design         | <i>In vitro</i> studies only                                | <i>In vivo</i> studies and others                          |
| Publication Language | English only                                                | Any other languages                                        |
| Publication period   | Published between 2010-2021                                 | Published before 2010                                      |
